# Supplementary material for: Deletion Mutants of Francisella Phagosomal Transporters FptA and FptF Are Highly Attenuated for Virulence and Are Protective Against Lethal Intranasal Francisella LVS Challenge in a Murine Model of Respiratory Tularemia
Source: MDPI journal article supplement (doi:10.3390/pathogens10070799), 2021-06-24
Supplement: s1 [file s1]

## Supplementary Materials

**Table S1.** Attenuation of *fpt* mutant strains in BALB/c mice <sup>1</sup>.

| Strain           | Dose (i.p.) on Day 1 (CFU) | Survival Post-Inoculation<br>on Day 29 | LD <sub>50</sub> |
|------------------|----------------------------|----------------------------------------|------------------|
| PBS              | -                          | 4/4; 100%                              | -                |
| LVS              | ~450                       | 0/4; 0%                                | <450 CFU         |
| LVSΔ <i>fptA</i> | ~3000                      | 4/4; 100%                              | >3000 CFU        |
| LVSΔ <i>fptF</i> | ~6000                      | 4/4; 100%                              | >6000 CFU        |

<sup>1</sup> Groups of 4 six- to eight-week-old BALB/c mice were inoculated i.p. with the indicated doses of either LVS, LVSΔ*fptA* or LVSΔ*fptF* strain; or PBS and followed for 29 days post-infection. Mice were euthanized once they lost > 20% of initial starting weight.

**Table S2.** Scoring criteria for histopathology analysis.

| 1) Extent of inflammatory changes                                                                                                        |                                                                      |
|------------------------------------------------------------------------------------------------------------------------------------------|----------------------------------------------------------------------|
| <b>1a) Global extent of Inflammation:</b> Percentage of surface area                                                                     | 0: <20% of tissue<br>1: >20% and <50%<br>2: >50%                     |
| <b>1b) Surface Area of Alveolar Destruction:</b> Surface area of alveolar destruction due to the inflammatory infiltrate                 | 0: <20% of tissue<br>1: >20% and <50%<br>2: >50%                     |
| <b>1c) Interstitial Involvement:</b> Inflammatory infiltrates affecting areas between preserved alveoli                                  | 0: <50%<br>1: >50%                                                   |
| <b>1d) Foci of Inflammation:</b> Foci of more than 50 inflammatory cells per 4mm <sup>2</sup> (one diffuse area is considered one focus) | 0: <1 per 4mm <sup>2</sup><br>1: >1 per 4mm <sup>2</sup>             |
| 2) Types of inflammatory cells                                                                                                           |                                                                      |
| <b>2a) Neutrophils</b>                                                                                                                   | 0: <20% of surface area<br>1: >20%                                   |
| <b>2b) Macrophages</b>                                                                                                                   | 0: <50% of surface area<br>1: >50%                                   |
| <b>2c) Lymphocytes</b>                                                                                                                   | 0: <20% of surface area<br>1: >20%                                   |
| 3) Other histopathologic features                                                                                                        |                                                                      |
| <b>3a) Edematous exudates and/or fibrin deposition</b>                                                                                   | 0: absent or focal<br>1: present                                     |
| <b>3b) Hyperplasia of Type II Pneumocytes:</b> Only including areas with preserved alveolar architecture                                 | 0: <5 out of 10 20x power fields<br>1: >5 out of 10 20x power fields |

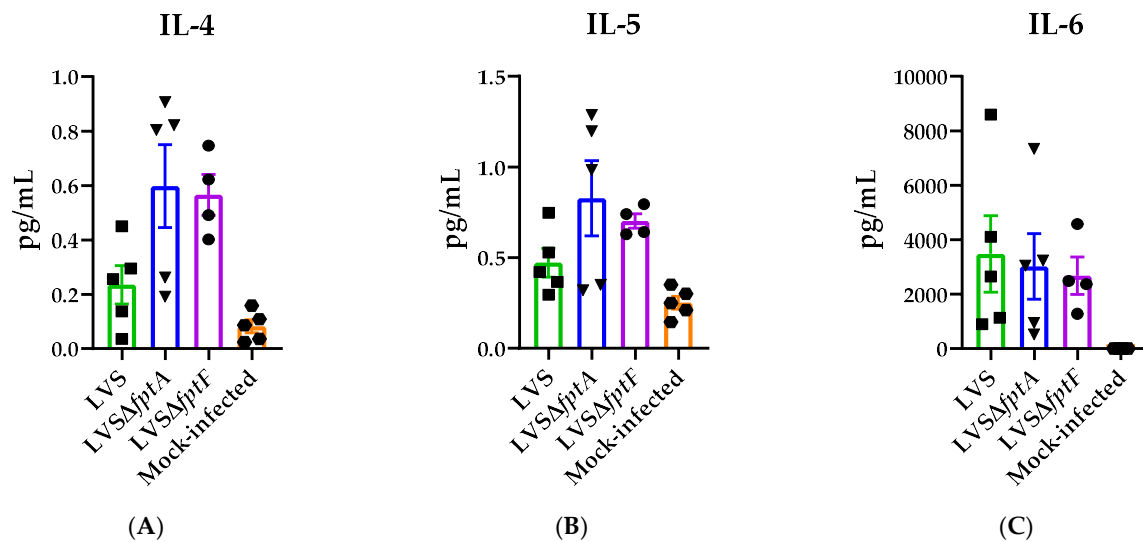

**Figure S1.** Cytokine secretion in the bronchoalveolar lavage fluid (BALF) of mice infected with *fpt* mutant strains. Groups of 5 eight-week-old male and female C57BL/6J mice were inoculated i.n. with ~350 CFU of either LVS, LVSΔ*fptA*, LVSΔ*fptF*, or PBS. BALF was harvested at day 6 post-infection for measurement of secreted cytokines using MSD. Symbols indicate cytokine values in individual mice. Bars represent means with SEM from duplicate measurements from one experiment. Levels of IL-4, IL-5 and IL-6 were not significantly elevated in any infection group versus mock infection. One BALF sample from the LVSΔ*fptF* group was excluded from analyses due to inefficient BALF harvest.

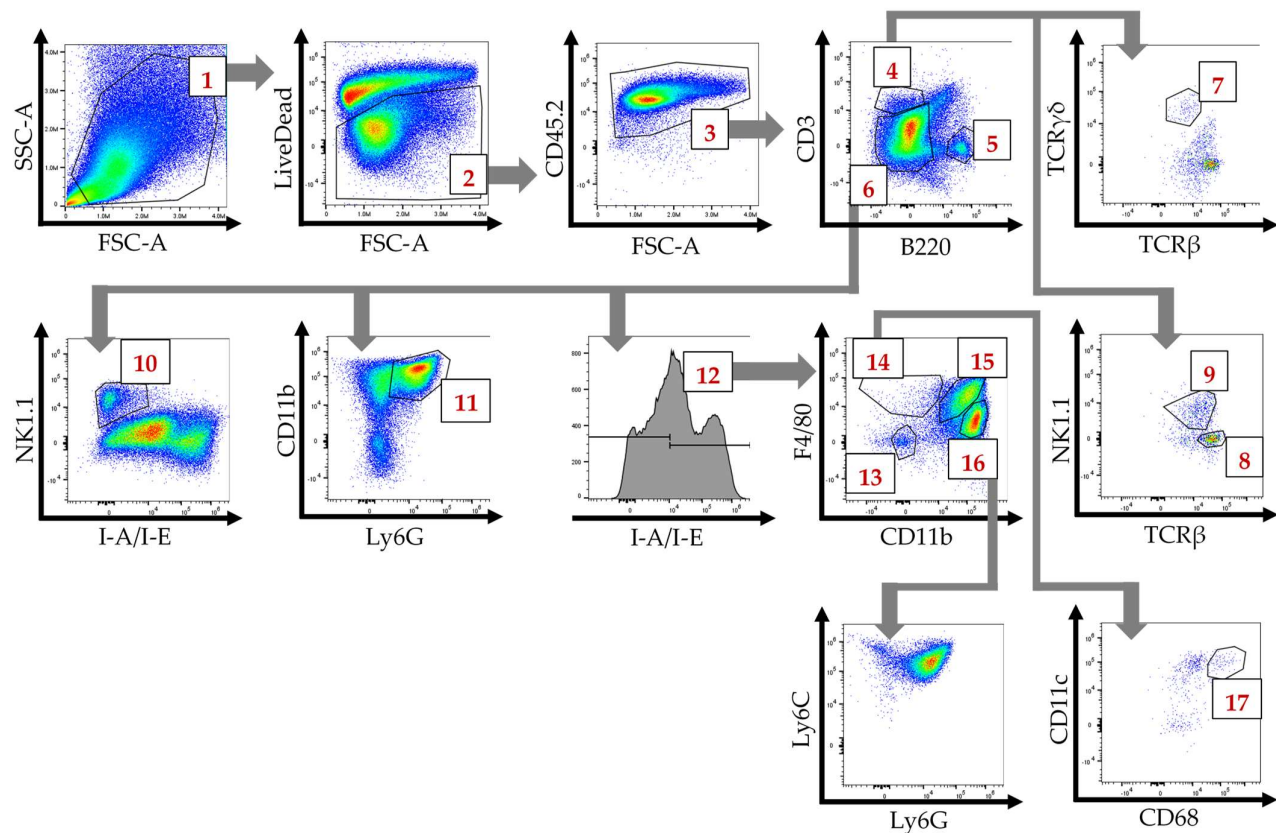

**Figure S2.** Gating strategy for flow cytometric analysis of infected lung samples. Lungs were harvested and homogenized into single cell suspensions for flow cytometric analysis. Samples were first gated on FSC-A and SSC-A to isolate cells (1). Remaining events were then gated on Zombie NIR<sup>-</sup> events to identify live cell populations (2). Immune cells were identified by CD45.2<sup>+</sup> events (3). These were the events used for the remaining analysis. T cells were defined as CD3<sup>+</sup> B220<sup>-</sup> populations (4). T cells were further subtyped into  $\gamma\delta$  T cells ( $\gamma\delta$ TCR<sup>+</sup>TCR $\beta$ <sup>-</sup>, 7),  $\alpha\beta$  T cells (NK1.1<sup>-</sup>, TCR $\beta$ <sup>+</sup>, 8), and natural killer-like T (NKT-like) cells (NK1.1<sup>+</sup>TCR $\beta$ <sup>+</sup>, 9). B cells were defined as CD3<sup>-</sup> B220<sup>+</sup> populations (5). Non-B and T cells were defined as CD3<sup>-</sup> B220<sup>-</sup> populations (6). From the non-B and non-T cell population, natural killer (NK) cells were gated as NK1.1<sup>+</sup> I-A/I-E<sup>-</sup> (Class II) (10). Neutrophils were gated from non-B and non-T cell populations as Ly6G<sup>+</sup> CD11b<sup>+</sup> cells (11). Non-B Class II<sup>+</sup> cells were gated from non-B and non-T cell populations as I-A/I-E<sup>+</sup> cells (12). From the non-B Class II<sup>+</sup> cells, the following populations were defined: dendritic cells (F4/80<sup>-</sup>, CD11b<sup>-</sup>, 13), CD11b<sup>-</sup> macrophages (F4/80<sup>+</sup>, CD11b<sup>-</sup>, 14), CD11b<sup>+</sup> macrophages (F4/80<sup>+</sup>, CD11b<sup>+</sup>, 15), Class II<sup>+</sup> neutrophils (F4/80<sup>-</sup>, CD11b<sup>+</sup>, 16). The Ly6C and Ly6G expression of the Class II<sup>+</sup> neutrophils are shown from population 16. The CD11b<sup>-</sup> macrophages were further subtyped into alveolar macrophages based on expression of CD68 and CD11c (17). Representative flow plots are shown for an LVS-infected animal. Similar gating strategy was used for all mock-infected and infected animals.

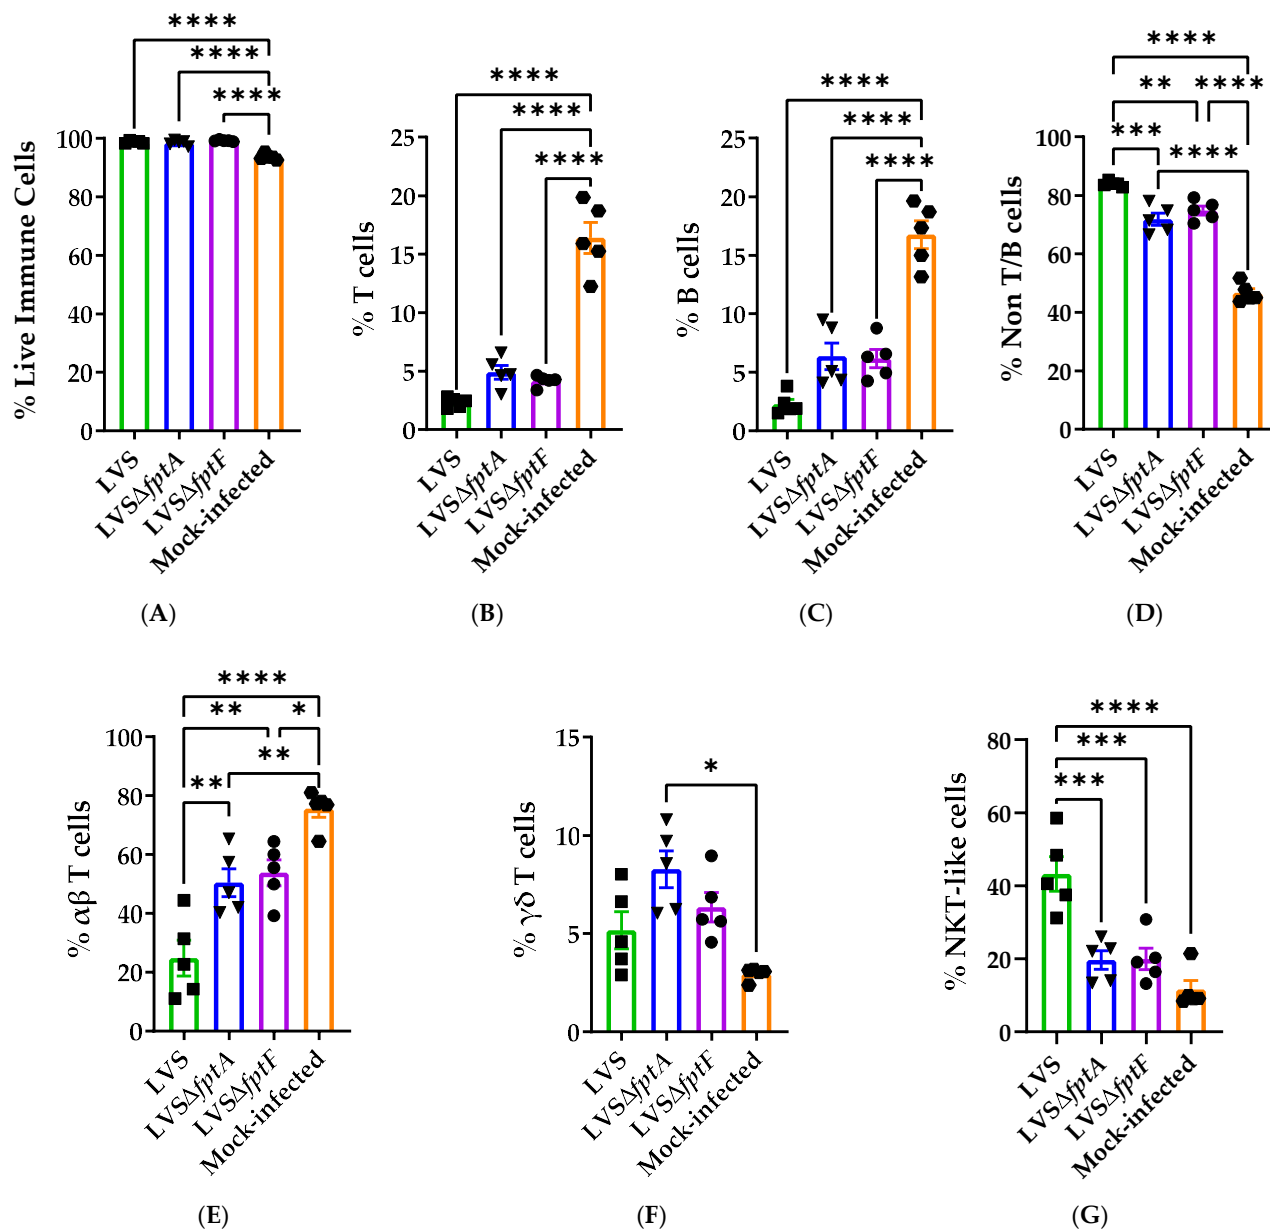

**Figure S3.** The frequencies of T cells, B cells and non-T/B cells change during infection of mice with *fpt* mutants. Groups of 5 eight-week-old male and female C57BL/6J mice were inoculated i.n. with ~350 CFU of either LVS, LVSΔ*fptA*, or LVSΔ*fptF*, or PBS. Lungs were harvested at day 6 post-infection and stained for flow cytometric analysis of responding immune cell populations. Symbols indicate values from individual mice. Bars represent means with SEM. \*\*\*\*,  $p < 0.0001$ ; \*\*\*,  $p = 0.001$ ; \*\*,  $p < 0.001$ ; \*,  $p < 0.05$  by a one-way ANOVA with a Tukey's post-test. Frequencies of live immune cells (Supplementary Figure S3A), T cells (Supplementary Figure S3B), B cells (Supplementary Figure S3C), non-T/B cells (Supplementary Figure S3D), αβ T cells (Supplementary Figure S3E), γδ T cells (Supplementary Figure S3F), and NKT-like cells (Supplementary Figure S3G) are shown.

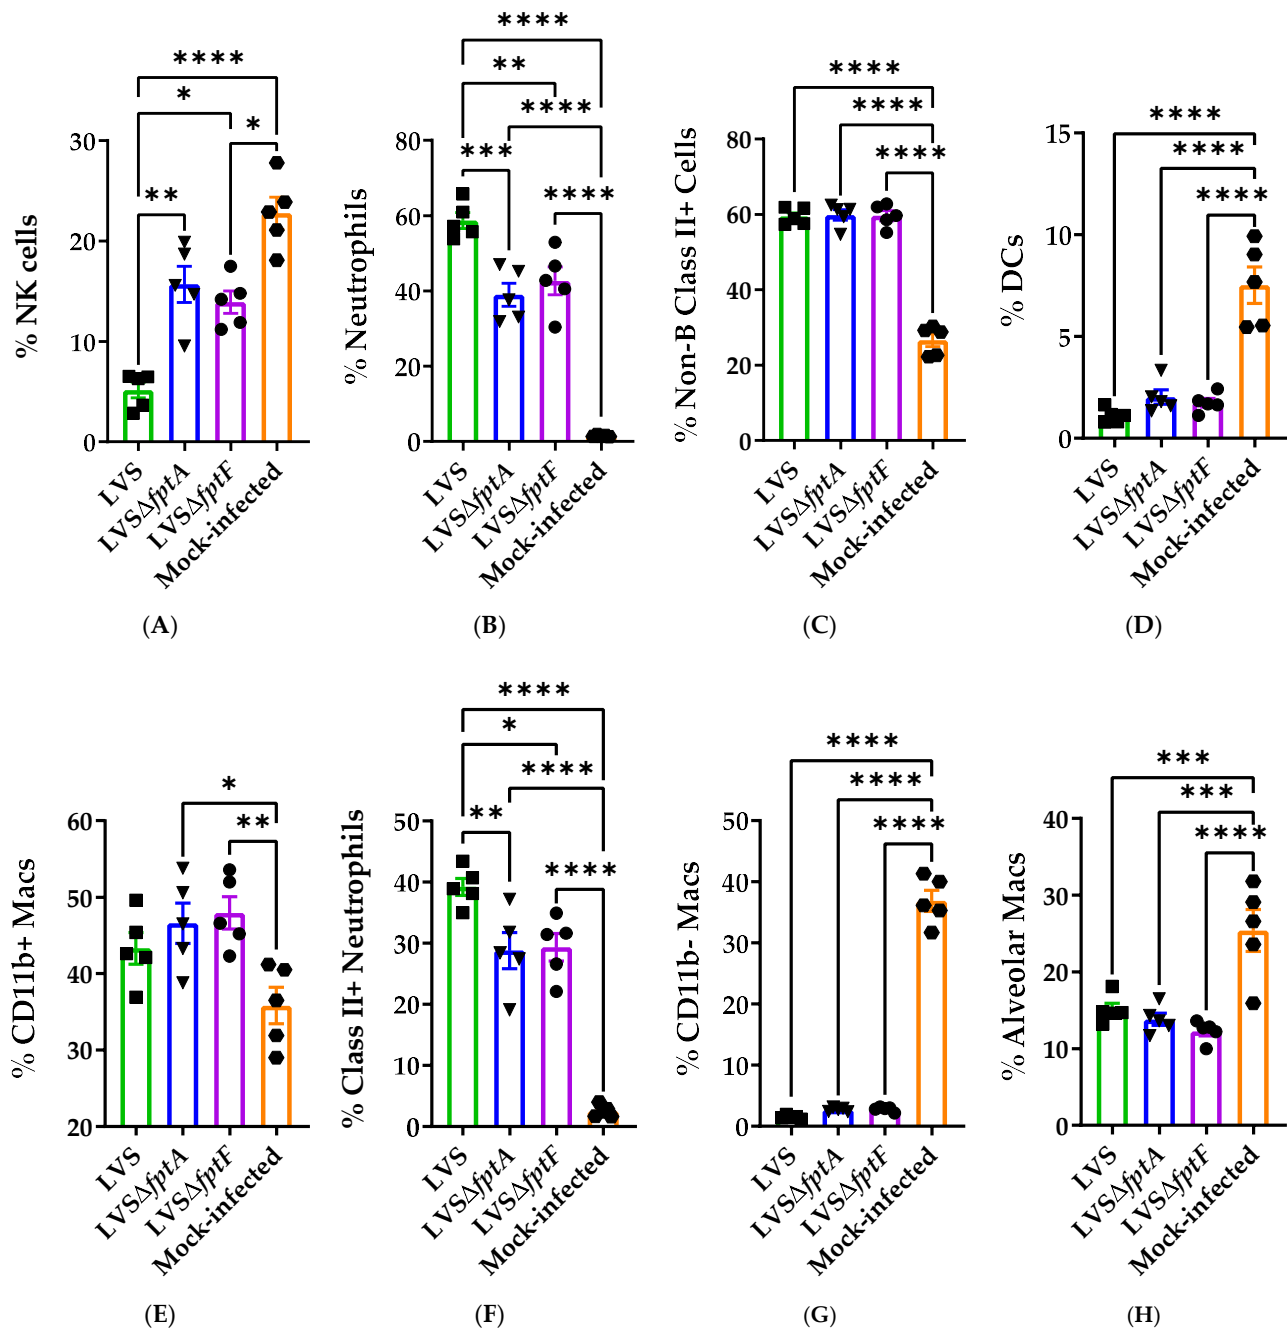

**Figure S4.** The frequencies of subsets of non-T/B cells change during infection of mice with *fpt* mutants. Groups of 5 eight-week-old male and female C57BL/6J mice were inoculated i.n. with ~350 CFU of either *LVS*, *LVSΔfptA*, or *LVSΔfptF*, or PBS. Lungs were harvested at day 6 post-infection and stained for flow cytometric analysis of responding immune cell populations. Symbols indicate values from individual mice. Bars represent means with SEM. \*\*\*\*,  $p < 0.0001$ ; \*\*\*,  $p = 0.001$ ; \*\*,  $p < 0.001$ ; \*,  $p < 0.05$  by a one-way ANOVA with a Tukey's post-test. Frequencies of NK cells (Supplementary Figure S4A), Neutrophils (Supplementary Figure S4B) non-B Class II+ cells (Supplementary Figure S4C), DCs (Supplementary Figure S4D), CD11b+ macrophages (Supplementary Figure S4E), Class II+ Neutrophils (Supplementary Figure S4F), CD11b- macrophages (Supplementary Figure S4G) and alveolar macrophages (Supplementary Figure S4H) are shown.
